# Supplementary material for: The correlation between novel peripheral blood cell ratios and 90-day mortality in patients with acute ischemic stroke
Source: PubMed Central journal article supplement (PMC7454963; doi:10.1371/journal.pone.0238312), 2020-08-28
Supplement: pone.0238312.s004.pdf [file pone.0238312.s004.pdf]

## 伦理审查批件

|             |                                                                                                                                                                                                                                                                                                                                                                                                                                                                                                                                                                                                                                                                                                                                                                                                                                                                                                                                       |      |               |
|-------------|---------------------------------------------------------------------------------------------------------------------------------------------------------------------------------------------------------------------------------------------------------------------------------------------------------------------------------------------------------------------------------------------------------------------------------------------------------------------------------------------------------------------------------------------------------------------------------------------------------------------------------------------------------------------------------------------------------------------------------------------------------------------------------------------------------------------------------------------------------------------------------------------------------------------------------------|------|---------------|
| 批件号         | 2017NL-012-01                                                                                                                                                                                                                                                                                                                                                                                                                                                                                                                                                                                                                                                                                                                                                                                                                                                                                                                         |      |               |
| 项目名称        | 基于“瘀热阻窍”治疗急性脑梗死的队列研究                                                                                                                                                                                                                                                                                                                                                                                                                                                                                                                                                                                                                                                                                                                                                                                                                                                                                                                  |      |               |
| 项目来源        | 江苏省中医药局科研专项课题                                                                                                                                                                                                                                                                                                                                                                                                                                                                                                                                                                                                                                                                                                                                                                                                                                                                                                                         |      |               |
| 研究单位        | 江苏省中医院                                                                                                                                                                                                                                                                                                                                                                                                                                                                                                                                                                                                                                                                                                                                                                                                                                                                                                                                |      |               |
| 主要研究者       | 吴明华                                                                                                                                                                                                                                                                                                                                                                                                                                                                                                                                                                                                                                                                                                                                                                                                                                                                                                                                   |      |               |
| 审查类别        | 初始审查申请                                                                                                                                                                                                                                                                                                                                                                                                                                                                                                                                                                                                                                                                                                                                                                                                                                                                                                                                | 审查方式 | 会议审查          |
| 审查日期        | 2017年03月29日                                                                                                                                                                                                                                                                                                                                                                                                                                                                                                                                                                                                                                                                                                                                                                                                                                                                                                                           | 审查地点 | 江苏省中医院5号楼402室 |
| 审查委员        | 吴明华、刘兰英、刘鸣、邱召娟、曲宁、王昕、徐玉红、徐中芹、姚昶、朱磊、朱永康                                                                                                                                                                                                                                                                                                                                                                                                                                                                                                                                                                                                                                                                                                                                                                                                                                                                                                |      |               |
| 审查批准文件      | 临床研究方案 版本号：2.0 版本日期：2016-10-12<br>知情同意书 版本号：1.0 版本日期：2017-03-16                                                                                                                                                                                                                                                                                                                                                                                                                                                                                                                                                                                                                                                                                                                                                                                                                                                                       |      |               |
| 审查意见        | <p>根据国家卫生计生委《涉及人的生物医学研究伦理审查办法》(2016)、CFDA《药物临床试验质量管理规范》(2003)、《医疗器械临床试验质量管理规范》(2016)、WMA《赫尔辛基宣言》和CIOMS《人体生物医学研究国际道德指南》的伦理原则，经本伦理委员会审查，同意按所批准的临床研究方案、知情同意书、招募材料开展本项研究。</p> <p>请遵循GCP原则、遵循伦理委员会批准的方案开展临床研究，保护受试者的健康与权利。</p> <p>经伦理委员会批准的研究项目在实施前，研究项目负责人应当将该研究项目的主要内容、伦理审查决定在医学研究登记备案信息系统进行登记。凡涉及中国人类遗传资源、需要报批的研究项目，应在获得中国人类遗传资源管理办公室批准后才能开始研究。</p> <p>研究过程中若变更主要研究者，对临床研究方案、知情同意书、招募材料等的任何修改，请申请人提交修正案审查申请。</p> <p>发生严重不良事件，请申请人及时提交严重不良事件报告。</p> <p>请按照伦理委员会规定的年度/定期审查频率，申请人在截止日期前1个月提交研究进展报告；申办者应当向组长单位伦理委员会提交各中心研究进展的汇总报告；当出现任何可能显著影响试验进行、或增加受试者危险的情况时，请申请人及时向伦理委员会提交书面报告。超出批件有效期，没有提交研究进展报告并获得伦理审查批准继续研究的项目，研究者必须立即停止所有研究活动，包括干预措施和数据收集。假若停止研究干预可能会对受试者造成伤害，研究者应当要求伦理委员会批准在研的受试者继续参加研究。</p> <p>研究纳入了不符合纳入标准或符合排除标准的受试者，符合中止试验规定而未让受试者退出研究，给予错误治疗或剂量，给予方案禁止的合并用药等没有遵从方案开展研究的情况；或可能对受试者的权益/健康、以及研究的科学性造成不良影响等违背GCP原则的情况，请申办者/监查员/研究者提交违背方案报告。</p> <p>申请人暂停或提前终止临床研究，请及时提交暂停/终止研究报告。</p> <p>完成临床研究，请申请人提交研究完成报告，以及概述研究发现和结论的总结报告。</p> |      |               |
| 年度/定期跟踪审查频率 | 请于2018年03月29日前1个月提交研究进展报告                                                                                                                                                                                                                                                                                                                                                                                                                                                                                                                                                                                                                                                                                                                                                                                                                                                                                                             |      |               |
| 有效期         | 12个月                                                                                                                                                                                                                                                                                                                                                                                                                                                                                                                                                                                                                                                                                                                                                                                                                                                                                                                                  |      |               |
| 联系人及联系电话    | 吴静 025-86560515                                                                                                                                                                                                                                                                                                                                                                                                                                                                                                                                                                                                                                                                                                                                                                                                                                                                                                                       |      |               |
| 主席签字        | 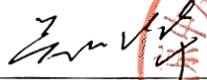                                                                                                                                                                                                                                                                                                                                                                                                                                                                                                                                                                                                                                                                                                                                                                                                                                                   |      |               |
| 伦理委员会       | 南京中医药大学附属医院（江苏省中医院）伦理委员会（盖章）                                                                                                                                                                                                                                                                                                                                                                                                                                                                                                                                                                                                                                                                                                                                                                                                                                                                                                          |      |               |
| 日期          | 2017年03月30日                                                                                                                                                                                                                                                                                                                                                                                                                                                                                                                                                                                                                                                                                                                                                                                                                                                                                                                           |      |               |
